# Supplementary material for: The Effect of Ondansetron Intravenous Administration to Caloric Intake for Patients of Gynecological Surgery
Source: Research Square preprint supplement (doi:10.21203/rs.3.rs-8437836/v1), 2025-12-31
Supplement: Supplementary file 1 [file a011ea2c5b799f069cbf2426.pdf]

**Table 1 Patients' Background**

|                                     | Group C     | Group O     | <i>p</i>            |
|-------------------------------------|-------------|-------------|---------------------|
| Number of cases                     | 51 (44.0%)  | 65 (56.0%)  |                     |
| Patients' age: mean, years          | 51.0 ± 1.7  | 52.4±1.6    | 0.678 <sup>a)</sup> |
| Body weight: mean, kg               | 59.4 ± 2.0  | 59.2±1.5    | 0.911 <sup>a)</sup> |
| Surgical Method                     |             |             | 0.874 <sup>b)</sup> |
| Vaginal surgery                     | 13          | 14          |                     |
| Laparoscopically assisted surgery   | 2           | 2           |                     |
| Open surgery                        | 36          | 49          |                     |
| Apfel Score Applicable of 2 factors | 3           | 5           | 1.000 <sup>b)</sup> |
| Apfel Score Applicable of 3 factors | 30          | 39          | 1.000 <sup>b)</sup> |
| Apfel Score Applicable of 4 factors | 18          | 21          | 0.843 <sup>b)</sup> |
| Amount of Fentanyl/weight (µg/kg)   | 7.92 ± 2.10 | 7.56 ± 2.88 | 0.372 <sup>a)</sup> |
| Amount of Anapain/weight (mg/kg)    | 4.60 ± 1.07 | 4.05 ± 0.81 | 0.002 <sup>a)</sup> |
| Operation Length                    | 94.0±6.7    | 91.5±4.5    | 0.876 <sup>a)</sup> |

Data were expressed as mean ± standard error and number of patients as appropriate

<sup>a)</sup>Used Wilcoxon rank sum test for statistical analysis.

<sup>b)</sup>Used the Fisher exact test.

**Table 2 incident rate of PONV**

|                       | Group C | Group O | <i>p</i> |
|-----------------------|---------|---------|----------|
| The day of surgery    |         |         |          |
| Overall               | 37.3%   | 12.3%   | 0.002    |
| Apfel Score factor #  | 0%      | 0%      | -        |
| Apfel Score factor #3 | 26.7%   | 15.4%   | 0.366    |
| Apfel Score factor #4 | 61.1%   | 9.5%    | 0.002    |
| One day after surgery |         |         |          |
| Overall               | 23.5%   | 21.5%   | 0.826    |
| Apfel Score factor #2 | 0%      | 0%      | -        |
| Apfel Score factor #3 | 23.3%   | 23.1%   | 1.000    |
| Apfel Score factor #4 | 27.8%   | 23.8%   | 1.000    |

Used the Fisher exact test.

**Table 3 Comparison of Caloric Intake, Next Day after Surgery**

|                                      | Group C    | Group O   | <i>p</i>            |
|--------------------------------------|------------|-----------|---------------------|
| Overall                              | n = 51     | n = 65    |                     |
| mean intake (kcal)                   | 601 ± 61   | 790 ± 52  | 0.013 <sup>a)</sup> |
| median (kcal)                        | 514        | 795       |                     |
| Apfel Score Applicable for 2 factors | n = 3      | n = 5     |                     |
| mean intake (kcal)                   | 1077 ± 177 | 1323 ± 51 | 0.375 <sup>a)</sup> |
| median (kcal)                        | 981        | 1347      |                     |
| Apfel Score Applicable for 3 factors | n = 30     | n = 39    |                     |
| mean intake (kcal)                   | 593 ± 76   | 807 ± 62  | 0.031 <sup>a)</sup> |
| median (kcal)                        | 493        | 836       |                     |
| Apfel Score Applicable for 4 factors | n = 18     | n = 21    |                     |
| mean intake (kcal)                   | 535 ± 109  | 648 ± 90  | 0.307 <sup>a)</sup> |
| median (kcal)                        | 433        | 576       |                     |

Data were expressed as mean intake ± standard error and number of patients as appropriate

<sup>a)</sup>Used Wilcoxon rank sum test for statistical analysis.

**Table 4 Result of Covariance Analysis (Difference of Caloric Intake with or without Ondansetron injection)**

| Factors | F Value | P Value | Standard Error of Average $\pm$ Caloric Intake (kcal) | Mean Difference (kcal) | 95% Confidence Interval |
|---------|---------|---------|-------------------------------------------------------|------------------------|-------------------------|
| Group C | -       | -       | 1188.3 $\pm$ 63.1                                     | -175.8                 | [-347.3,-4.3]           |
| Group O | 4.131   | 0.045   | 1364.1 $\pm$ 55.9                                     | -                      | -                       |

**Table 5 Effects of Covariates on Covariance Analysis**

| Elements           | F Value |  | P Value | Regression Coefficient B | 95% Confidence Interval |
|--------------------|---------|--|---------|--------------------------|-------------------------|
| Apfel score        | 7.386   |  | 0.008   | -196.8                   | [-340.4, -53.3]         |
| Amount of Anapain  | 0.248   |  | 0.619   | -28.4                    | [-141.4, 84.6]          |
| Amount of Fentanyl | 0.652   |  | 0.421   | 16810.9                  | [-24469.4, 58091.2]     |
| Surgery Hour       | 1.170   |  | 0.282   | -1.06                    | [-3.02, 0.89]           |
